# Supplementary material for: Thrombopoietin receptor agonists: ten years later
Source: PubMed Central journal article supplement — Haematologica. 2019 May 9;104(6):1112–23. doi: 10.3324/haematol.2018.212845 (PMC6545830; doi:10.3324/haematol.2018.212845), 2019-06
Supplement: 2018.212845_GHANIMA_SUPPL.pdf [file 2018.212845_GHANIMA_SUPPL.pdf]

## Thrombopoietin receptor agonists: ten years later

Waleed Ghanima,<sup>1,2</sup> Nichola Cooper,<sup>3</sup> Francesco Rodeghiero,<sup>4</sup> Bertrand Godeau<sup>5</sup> and James B. Bussel<sup>6</sup>

<sup>1</sup>Departments of Medicine, Hematology-Oncology and Research, Østfold Hospital Trust, Norway; <sup>2</sup>Department of Hematology, Institute of Clinical Medicine, University of Oslo, Norway; <sup>3</sup>Department of Medicine, Hammersmith Hospital, Imperial College, London, UK; <sup>4</sup>Hematology Project Foundation and Department of Cell Therapy and Hematology, S. Bortolo Hospital, Vicenza, Italy; <sup>5</sup>Department of Internal Medicine, Henri Mondor University Hospital, Assistance Publique-Hopitaux de Paris, UPEC, Créteil, France and <sup>6</sup>Department of Pediatrics, Weill Cornell Medicine, New York, NY, USA

©2019 Ferrata Storti Foundation. This is an open-access paper. doi:10.3324/haematol.2018.212845

Received: November 28, 2018.

Accepted: March 11, 2019.

Pre-published: May 9, 2019.

Correspondence: *WALEED GHANIMA* - waleed.ghanima@SO-HF.no

---

**Supplemental table 1 Incidence of thromboembolism with romiplostim and eltrombopag in phase 1-2 studies and in randomized phase 3 placebo-controlled studies in adults**

| N.                 | Ref.         | Study characteristics and exclusion criteria for thrombosis <sup>^</sup>                                                                                | N. exposed<br>Dose<br>Exposure time                                                                   | N. controls*                 | Thrombosis in exposed (N pts/100 pt-yrs when reported) <sup>°</sup><br>[N events/100 pt-yrs] | Thrombosis in controls (N pts/100 pt-yrs when reported)<br>[N events/100 pt-yrs] |
|--------------------|--------------|---------------------------------------------------------------------------------------------------------------------------------------------------------|-------------------------------------------------------------------------------------------------------|------------------------------|----------------------------------------------------------------------------------------------|----------------------------------------------------------------------------------|
| <b>Romiplostim</b> |              |                                                                                                                                                         |                                                                                                       |                              |                                                                                              |                                                                                  |
| 1                  | Wang (1)     | Pharmacodynamics/pharmacokinetics<br>Double blind placebo-controlled in healthy non obese males<br>Subjects with cardiovascular risk factors excluded   | 32<br>Single dose 0.1-10 mcg/kg<br>(Observation 42 days)                                              | 16 placebo                   | 0                                                                                            | 0                                                                                |
| 2                  | Bussel (2)   | Phase 2 double blind in ITP pts<br>Pts with any risk factors for T or history of cardiovascular disease excluded                                        | 17<br>3 groups: 8 pts 1 mcg /kg; 8 pts 3 mcg /kg; 1 pt 6 mcg /kg for 6 weeks<br>(Observation 78 days) | 4 placebo                    | 0                                                                                            | 1 popliteal DVT post splx (for intracranial bleeding)                            |
| 3                  | Kuter (3)    | Two parallel placebo-controlled trials in ITP pts<br>Pts with $\leq$ 1 yr history of arterial or any history of venous T or risk factors for T excluded | 42 splx - 41 non-splx<br>1-15 mcg /kg weekly for 24 weeks<br>(Observation 24-36 weeks)                | 21 splx -21 non-splx placebo | 1 † cerebral thrombosis<br>1 arterial T                                                      | 1 † PE                                                                           |
| 4                  | Kuter (4)    | Randomized open-label in non-splx ITP pts<br>No exclusion for thrombotic risk<br>NCT00415532                                                            | 157<br>adjusted dose max 10 mcg /kg weekly for 52 weeks                                               | 77<br>SOC                    | 11 events in 6 pts<br>(4.3)<br>[7.8]                                                         | 2 events in 2 pts<br>(3.4)<br>[3.4]                                              |
| 5                  | Shirasugi(5) | Randomized double-blind placebo-controlled phase 3 in Japanese ITP pts.<br>Pts with history of arterial/venous T excluded<br>NCT00603642                | 22<br>adjusted dose max 10 mcg /kg weekly for 12 weeks<br>(Observation 30 days)                       | 12<br>placebo                | 0                                                                                            | 0                                                                                |
| 6                  | Yang (6)     | Double bind placebo controlled phase 3 in                                                                                                               | 104<br>adjusted dose 25-75                                                                            | 51<br>placebo                | 1 cerebral infarction                                                                        | 0                                                                                |

|                    |               |                                                                                                                                                                                                                                           |                                                                                                                                                                            |                               |                                                                                |                          |
|--------------------|---------------|-------------------------------------------------------------------------------------------------------------------------------------------------------------------------------------------------------------------------------------------|----------------------------------------------------------------------------------------------------------------------------------------------------------------------------|-------------------------------|--------------------------------------------------------------------------------|--------------------------|
|                    |               | Chinese ITP pts<br>Pts with history of arterial/venous T or risk factors for T including thrombophilia excluded                                                                                                                           | mg daily for 8 weeks                                                                                                                                                       |                               | 1 DVT                                                                          |                          |
| <b>Eltrombopag</b> |               |                                                                                                                                                                                                                                           |                                                                                                                                                                            |                               |                                                                                |                          |
| 7                  | Jenkins (7)   | Phase 1 placebo-controlled dose finding in 72 healthy subjects<br>Pts with history of T excluded                                                                                                                                          | 54<br>9 pts for each of 6 dosage groups: 5, 10, 20, 30, 50, 75 mg daily for 10 days                                                                                        | 18 placebo                    | 0                                                                              | 0                        |
| 8                  | Bussel (1)    | Phase 2, double blind, placebo controlled<br>Pts with T < 1 yr, MI < 3 months or hormonal tx excluded                                                                                                                                     | 88<br>3 groups: 30 pts on 30 mg, 30 on 50, and 28 on 75 mg daily for 6 weeks                                                                                               | 29 placebo                    | 1 † for multiorgan failure (small vessels of the liver and kidneys on autopsy) | 0                        |
| 9                  | Bussel (8)    | Phase 3, double blind, placebo controlled<br>Pts with T < 1 yr, MI < 3 months or hormonal tx excluded                                                                                                                                     | 76<br>adjusted dose: 50 mg daily for 3 wks, increasable up to 75 mg daily for other 3 weeks                                                                                | 38 placebo                    | 0                                                                              | 0                        |
| 10                 | Cheng (9)     | Phase 3, double-blind, placebo-controlled study<br>Pts with history of arterial/venous T or risk factors for T including hereditary thrombophilia or family history of T excluded                                                         | 135<br>adjusted dose: 50 mg daily up to day 22, then adjusted 25-75 for 6 months                                                                                           | 62 placebo                    | 2 PE<br>1 DVT                                                                  | None                     |
| 11                 | Tomiyama (10) | 7-wk double-blind phase (15 eltrombopag 8 placebo) followed by 19 or 26-wk open-label phase (with eltrombopag)<br>Pts with ≤ 1 yr suspected or confirmed history of arterial/venous T not on antiplatelet tx for thrombotic risk excluded | Double blind phase: 15<br>12.5 to 25 mg daily for 6 weeks<br><br>Open-label phase: 23 (15 for additional 19 weeks and 8 for 26 weeks)<br>adjusted dose 12.5 to 50 mg daily | Double blind phase: 8 placebo | Double blind phase: 1 TIA<br><br>Open-label phase: none                        | Double blind phase: none |

T, thrombosis; DVT, deep vein thrombosis; splx, splenectomy; †, death; PE, pulmonary embolism; SOC, standard of care; MI, myocardial infarction; TIA, transient ischemic attack

^Exclusion criteria for thrombosis as reported in <http://clinicaltrials.gov> under each study number or as described in the articles, whichever was more restrictive

\*Same exposure time of treated with TPO-RA

°Incidence rate calculated censoring after 1<sup>st</sup> event during exposure (corresponding to the number of patients).

**Supplemental table 2 Incidence of thromboembolism with romiplostim and eltrombopag in single-arm studies in adults**

| N.                 | Ref            | Study characteristics and exclusion criteria for thrombosis <sup>^</sup>                                                                                                                                | N. exposed<br>Dose<br>Exposure time                                                                                                                                 | Thrombosis (N/100 pt-yrs)                                                                |
|--------------------|----------------|---------------------------------------------------------------------------------------------------------------------------------------------------------------------------------------------------------|---------------------------------------------------------------------------------------------------------------------------------------------------------------------|------------------------------------------------------------------------------------------|
| <b>Romiplostim</b> |                |                                                                                                                                                                                                         |                                                                                                                                                                     |                                                                                          |
| 12                 | Bussel (2)     | Phase 1<br>Pts with any known risk factors for T or history of cardiovascular disease excluded                                                                                                          | 24<br>6 groups of 4 pts:<br>0.2, 0.5, 1, 3, 6, 10 mcg /kg<br>2 doses 1 week apart<br>(Observation 78 days)                                                          | None                                                                                     |
| 13                 | Newland (11)   | Open-label phase 1-2 in ITP patients<br>Pts with history of arterial/venous T or risk factors for T excluded                                                                                            | 16<br>4 groups of pts:<br>30, 100, 300, 500 mcg total dose repeated after 2 or 3 weeks<br>(Observation 13 weeks)                                                    | None                                                                                     |
| 14                 | Shirasugiv (5) | Phase 2, open-label in Japanese ITP pts.<br>Pts with history of arterial/venous T or risk factors for T excluded                                                                                        | 12<br>3 groups of 4 pts:<br>1, 3, 6 mcg /kg, 2 weekly doses, then observation for 3 weeks<br>5 entered tx-continuation phase (up to 14-22 weeks)                    | None                                                                                     |
| 15                 | Janssens (12)  | Phase 4, prospective, open-label single-arm<br>3 sequentially staggered cohorts<br>No exclusion criteria for T                                                                                          | 169<br>adjusted dose for up to 3 yrs:<br>cohort 1: 147 wks<br>cohort 2: 155 wks<br>cohort 3: 155 wks;<br>103 completed all 3 yrs Annualized incidence rate provided | 21 events in 15 pts (8.9%)<br>Event rate 3.9/100 pt-yrs<br>+ 1 death (concurrent causes) |
| 16                 | Newland (13)   | Open-label, phase 2 interventional single arm describing platelet responses and remission rates in adults with ITP $\leq$ 6 months<br>Pts with history of T excluded                                    | 75<br>Estimated weekly dose of 2.9 mcg /kg, for up to 12 months; forced tapering once stable response reached                                                       | 1 reversible ischemic neurologic deficit                                                 |
| <b>Eltrombopag</b> |                |                                                                                                                                                                                                         |                                                                                                                                                                     |                                                                                          |
| 17                 | Bussel (14)    | Open-label, single-arm intermittent dosing in pts with ITP > 6 months<br>Pts with history of arterial/venous T or risk factors for T including hereditary thrombophilia or family history of T excluded | 66 cycle 1<br>55 cycle 2<br>51 cycle 3<br>50 mg daily, increasable to 75 mg<br>Each cycle up to 6 wks, with a 4-wk interval between cycles                          | None                                                                                     |

Splx, splenectomy; DVT, deep vein thrombosis, T, thrombosis

<sup>^</sup>Exclusion criteria for thrombosis as reported in <http://clinicaltrials.gov> under each study number or as described in the articles, whichever was more restrictive

\* In general, all studies had a minimum of 4-wks observation after treatment discontinuation. Beyond this time, no thrombotic events were reported.

1. Bussel JB, Cheng G, Saleh MN, Psaila B, Kovaleva L, Meddeb B, et al. Eltrombopag for the treatment of chronic idiopathic thrombocytopenic purpura. *N Engl J Med*. 2007 Nov 29;357(22):2237-47.
2. Bussel JB, Kuter DJ, George JN, McMillan R, Aledort LM, Conklin GT, et al. AMG 531, a thrombopoiesis-stimulating protein, for chronic ITP. *N Engl J Med*. 2006 Oct 19;355(16):1672-81.
3. Kuter DJ, Bussel JB, Lyons RM, Pullarkat V, Gernsheimer TB, Senecal FM, et al. Efficacy of romiplostim in patients with chronic immune thrombocytopenic purpura: a double-blind randomised controlled trial. *Lancet*. 2008 Feb 2;371(9610):395-403.
4. Kuter DJ, Rummel M, Boccia R, Macik BG, Pabinger I, Selleslag D, et al. Romiplostim or standard of care in patients with immune thrombocytopenia. *N Engl J Med*. 2010 Nov 11;363(20):1889-99.
5. Shirasugi Y, Ando K, Miyazaki K, Tomiyama Y, Okamoto S, Kurokawa M, et al. Romiplostim for the treatment of chronic immune thrombocytopenia in adult Japanese patients: a double-blind, randomized Phase III clinical trial. *Int J Hematol*. 2011 Jul;94(1):71-80.
6. Yang R, Li J, Jin J, Huang M, Yu Z, Xu X, et al. Multicentre, randomised phase III study of the efficacy and safety of eltrombopag in Chinese patients with chronic immune thrombocytopenia. *Br J Haematol*. 2017 Jan;176(1):101-10.
7. Jenkins JM, Williams D, Deng Y, Uhl J, Kitchen V, Collins D, et al. Phase 1 clinical study of eltrombopag, an oral, nonpeptide thrombopoietin receptor agonist. *Blood*. 2007 Jun 1;109(11):4739-41.
8. Bussel JB, Provan D, Shamsi T, Cheng G, Psaila B, Kovaleva L, et al. Effect of eltrombopag on platelet counts and bleeding during treatment of chronic idiopathic thrombocytopenic purpura: a randomised, double-blind, placebo-controlled trial. *Lancet*. 2009 Feb 21;373(9664):641-8.
9. Cheng G, Saleh MN, Marcher C, Vasey S, Mayer B, Aivado M, et al. Eltrombopag for management of chronic immune thrombocytopenia (RAISE): a 6-month, randomised, phase 3 study. *Lancet*. 2011 Aug 23;377:393-402.
10. Tomiyama Y, Miyakawa Y, Okamoto S, Katsutani S, Kimura A, Okoshi Y, et al. A lower starting dose of eltrombopag is efficacious in Japanese patients with previously treated chronic immune thrombocytopenia. *J Thromb Haemost*. 2012 May;10(5):799-806.
11. Newland A, Caulier MT, Kappers-Klunne M, Schipperus MR, Lefrere F, Zwaginga JJ, et al. An open-label, unit dose-finding study of AMG 531, a novel thrombopoiesis-stimulating peptibody, in patients with immune thrombocytopenic purpura. *Br J Haematol*. 2006 Nov;135(4):547-53.
12. Janssens A, Rodeghiero F, Anderson D, Chong BH, Boda Z, Pabinger I, et al. Changes in bone marrow morphology in adults receiving romiplostim for the treatment of thrombocytopenia associated with primary immune thrombocytopenia. *Ann Hematol*. 2016 Jun;95(7):1077-87.

13. Newland A, Godeau B, Priego V, Viillard JF, Lopez Fernandez MF, Orejudos A, et al. Remission and platelet responses with romiplostim in primary immune thrombocytopenia: final results from a phase 2 study. *Br J Haematol.* 2016 Jan;172(2):262-73.
14. Bussel JB, Saleh MN, Vasey SY, Mayer B, Arning M, Stone NL. Repeated short-term use of eltrombopag in patients with chronic immune thrombocytopenia (ITP). *Br J Haematol.* 2013 Feb;160(4):538-46.
