# Supplementary material for: Thrombopoietin receptor agonists: ten years later
Source: PubMed Central journal article supplement — Haematologica. 2019 May 9;104(6):1112–23. doi: 10.3324/haematol.2018.212845 (PMC6545830; doi:10.3324/haematol.2018.212845), 2019-06

# Cellular mechanisms of action of thrombopoietin and thrombopoietin receptor agonists, Eltrombopag and Romiplostim, used for the treatment of immune thrombocytopenia

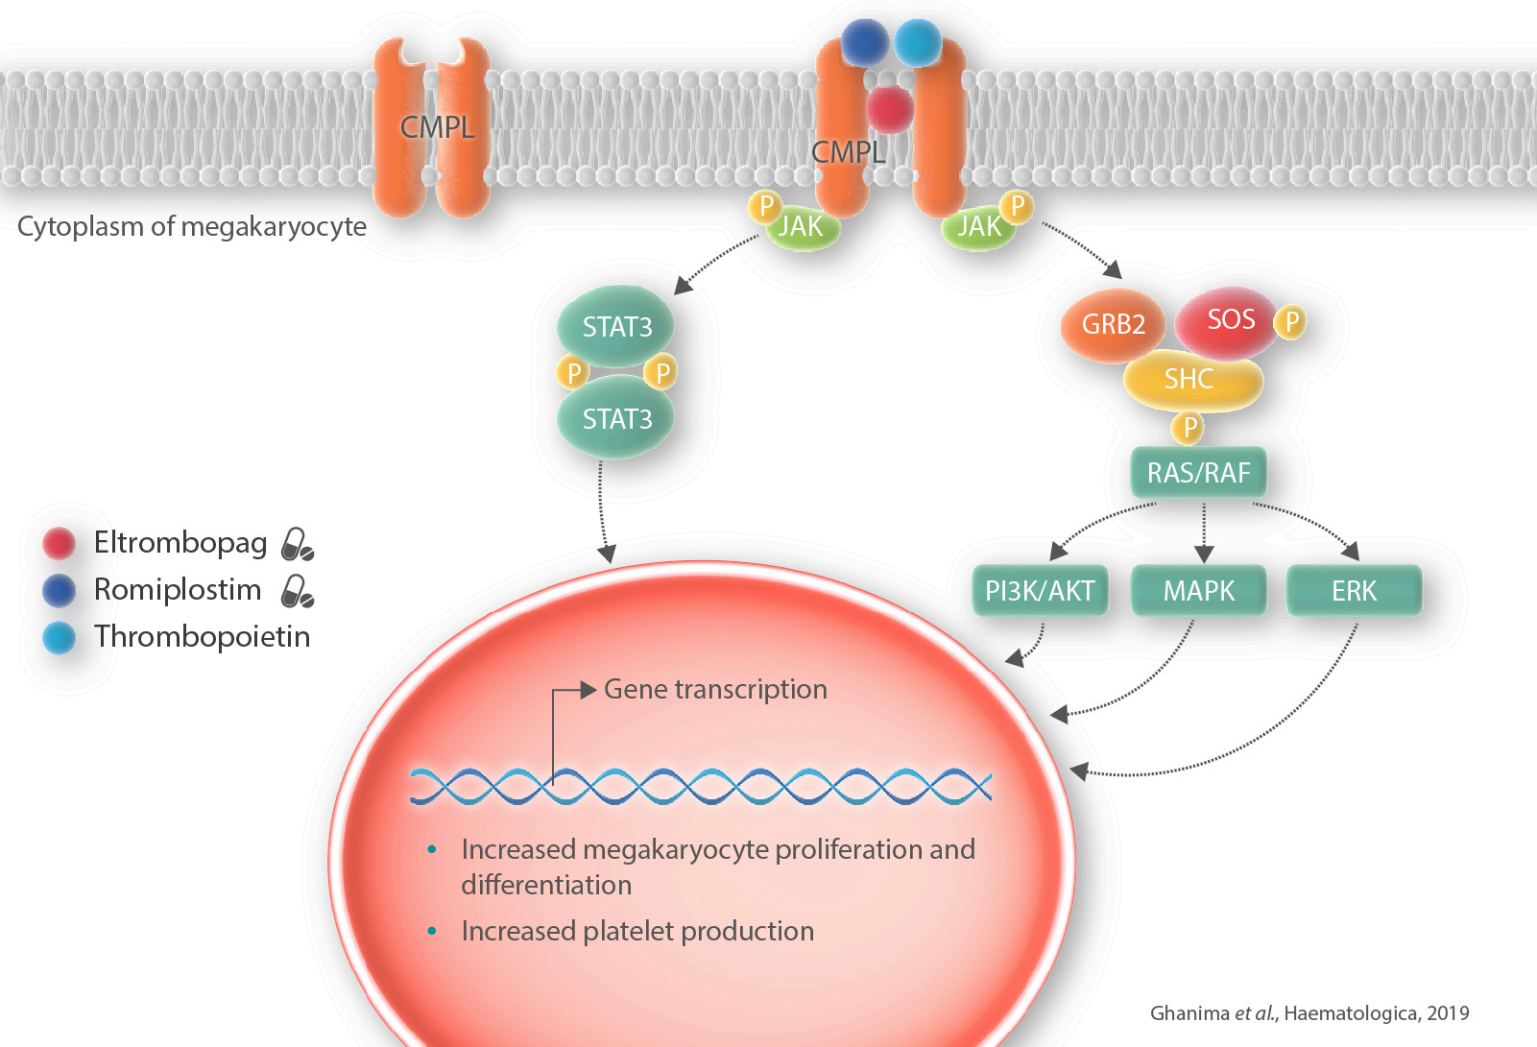

Supplement: HAEMATOL-2018-212845v3-Ghanima-01.pdf [file HAEMATOL-2018-212845v3-Ghanima-01.pdf]
